# Supplementary material for: Emergent Biosynthetic Capacity in Simple Microbial Communities
Source: PubMed Central journal article supplement (PMC4084645; doi:10.1371/journal.pcbi.1003695), 2014-07-03
Supplement: pcbi.1003695.s011.pdf [file pcbi.1003695.s011.pdf]

**Table S1: SEED models used in the study**

| <b>SEED Model Name</b>                             | <b>SEED ID</b> | <b>IMG Genome Name / Sample Name</b>          |
|----------------------------------------------------|----------------|-----------------------------------------------|
| Acinetobacter sp. ADP1                             | Core62977_3    | Acinetobacter baylyi ADP1                     |
| Anaeromyxobacter dehalogenans 2CP- C               | Core290397_13  | Anaeromyxobacter dehalogenans 2CP-C           |
| Anaplasma marginale str. St. Maries                | Core234826_3   | Anaplasma marginale St. Maries                |
| Aquifex aeolicus VF5                               | Core224324_1   | Aquifex aeolicus VF5                          |
| Bacillus anthracis str. Ames Ancestor              | Core261594_1   | Bacillus anthracis Ames Ancestor A2084        |
| Bacteroides fragilis YCH46                         | Core295405_3   | Bacteroides fragilis YCH46                    |
| Bdellovibrio bacteriovorus HD100                   | Core264462_1   | Bdellovibrio bacteriovorus HD100              |
| Bifidobacterium longum NCC2705                     | Core206672_1   | Bifidobacterium longum NCC2705                |
| Bordetella pertussis Tohama I                      | Core257313_1   | Bordetella pertussis Tohama I                 |
| Borrelia burgdorferi B31                           | Core224326_1   | Borrelia burgdorferi B31                      |
| Bradyrhizobium japonicum USDA 110                  | Core224911_1   | Bradyrhizobium japonicum USDA 110             |
| Brucella melitensis 16M                            | Core224914_1   | Brucella melitensis bv 1, 16M                 |
| Buchnera aphidicola str. APS (Acyrtosiphon pismum) | Core107806_1   | Buchnera aphidicola APS                       |
| Burkholderia pseudomallei K96243                   | Core272560_3   | Burkholderia pseudomallei K96243              |
| Campylobacter jejuni subsp. jejuni NCTC 11168      | Core192222_1   | Campylobacter jejuni jejuni NCTC 11168        |
| Blochmannia floridanus                             | Core203907_1   | Candidatus Blochmannia floridanus             |
| Carboxydotherrmus hydrogenoformans Z-2901          | Core246194_3   | Carboxydotherrmus hydrogenoformans Z-2901     |
| Caulobacter crescentus CB15                        | Core190650_1   | Caulobacter crescentus CB15                   |
| Chlamydia trachomatis D/UW-3/CX                    | Core272561_1   | Chlamydia trachomatis D/UW-3/CX (sv D)        |
| Chlamydophila pneumoniae AR39                      | Core115711_7   | Chlamydophila pneumoniae AR39                 |
| Clostridium acetobutylicum ATCC 824                | Core272562_1   | Clostridium acetobutylicum ATCC 824           |
| Clostridium tetani E88                             | Core212717_1   | Clostridium tetani Massachusetts E88          |
| Coxiella burnetii RSA 493                          | Core227377_1   | Coxiella burnetii Nine Mile phase I / RSA 493 |
| Cytophaga hutchinsonii ATCC 33406                  | Core269798_12  | Cytophaga hutchinsonii ATCC 33406             |
| Dehalococcoides ethenogenes 195                    | Core243164_3   | Dehalococcoides ethenogenes 195               |
| Desulfovibrio desulfuricans G20                    | Core207559_3   | Desulfovibrio alaskensis G20                  |
| Ehrlichia ruminantium str. Gardel                  | Core302409_3   | Ehrlichia ruminantium Gardel                  |
| Escherichia coli W3110                             | Core316407_3   | Escherichia coli K12- W3110                   |
| Francisella tularensis subsp. tularensis Schu 4    | Core177416_3   | Francisella tularensis tularensis CHU S4      |
| Frankia sp. CcI3                                   | Core106370_11  | Frankia sp. CcI3                              |
| Gluconobacter oxydans 621H                         | Core290633_1   | Gluconobacter oxydans 621H                    |
| Haemophilus influenzae Rd KW20                     | Core71421_1    | Haemophilus influenzae Rd (KW20)              |
| Helicobacter pylori 26695                          | Core85962_1    | Helicobacter pylori 26695                     |
| Idiomarina loihiensis L2TR                         | Core283942_3   | Idiomarina loihiensis L2TR                    |
| Lactobacillus plantarum WCFS1                      | Core220668_1   | Lactobacillus plantarum WCFS1                 |
| Lactococcus lactis subsp. lactis III403            | Core272623_1   | Lactococcus lactis lactis III403              |

|                                                                             |               |                                                             |
|-----------------------------------------------------------------------------|---------------|-------------------------------------------------------------|
| <i>Legionella pneumophila</i> subsp. <i>pneumophila</i> str. Philadelphia 1 | Core272624_3  | <i>Legionella pneumophila pneumophila</i> Philadelphia-1    |
| <i>Leifsonia xyli</i> subsp. <i>xyli</i> str. CTCB07                        | Core281090_3  | <i>Leifsonia xyli xyli</i> CTCB07                           |
| <i>Leptospira interrogans</i> serovar Copenhageni str. Fiocruz L1-130       | Core267671_1  | <i>Leptospira interrogans sv</i> Copenhageni Fiocruz L1-130 |
| <i>Listeria innocua</i> Clip11262                                           | Core272626_1  | <i>Listeria innocua</i> Clip11262                           |
| <i>Listeria monocytogenes</i> EGD-e                                         | Core169963_1  | <i>Listeria monocytogenes</i> EGD-e                         |
| <i>Magnetospirillum magneticum</i> AMB-1                                    | Core342108_5  | <i>Magnetospirillum magneticum</i> AMB-1                    |
| <i>Mannheimia succiniciproducens</i> MBEL55E                                | Core221988_1  | <i>Basfia succiniciproducens</i> MBEL55E                    |
| <i>Methylobacillus flagellatus</i> KT                                       | Core265072_7  | <i>Methylobacillus flagellatus</i> KT                       |
| <i>Methylococcus capsulatus</i> str. Bath                                   | Core243233_4  | <i>Methylococcus capsulatus</i> Bath                        |
| <i>Mycobacterium tuberculosis</i> H37Rv                                     | Core83332_1   | <i>Mycobacterium tuberculosis</i> H37Rv (lab strain)        |
| <i>Mycoplasma genitalium</i> G-37                                           | Core243273_1  | <i>Mycoplasma genitalium</i> G37                            |
| <i>Mycoplasma pulmonis</i> UAB CTIP                                         | Core272635_1  | <i>Mycoplasma pulmonis</i> UAB CTIP                         |
| <i>Neisseria gonorrhoeae</i> FA 1090                                        | Core242231_4  | <i>Neisseria gonorrhoeae</i> FA 1090                        |
| <i>Neisseria meningitidis</i> MC58                                          | Core122586_1  | <i>Neisseria meningitidis</i> MC58                          |
| <i>Nitrosococcus oceani</i> ATCC 19707                                      | Core323261_3  | <i>Nitrosococcus oceani</i> C-107, ATCC 19707               |
| <i>Nitrosomonas europaea</i> ATCC 19718                                     | Core228410_1  | <i>Nitrosomonas europaea</i> ATCC 19718                     |
| <i>Nocardia farcinica</i> IFM 10152                                         | Core247156_1  | <i>Nocardia farcinica</i> IFM 10152                         |
| Onion yellows phytoplasma OY-M                                              | Core262768_1  | Candidatus <i>Phytoplasma</i> onion yellows OY-M            |
| <i>Photobacterium profundum</i> SS9                                         | Core298386_1  | <i>Photobacterium profundum</i> SS9                         |
| <i>Photorhabdus luminescens</i> subsp. <i>laumondii</i> TTO1                | Core243265_1  | <i>Photorhabdus luminescens laumondii</i> TTO1              |
| <i>Polaromonas</i> sp. JS666                                                | Core296591_1  | <i>Polaromonas</i> sp. JS666                                |
| <i>Pseudoalteromonas haloplanktis</i> TAC125                                | Core326442_4  | <i>Pseudoalteromonas haloplanktis</i> TAC125                |
| <i>Pseudomonas aeruginosa</i> PAO1                                          | Core208964_1  | <i>Pseudomonas aeruginosa</i> PAO1                          |
| <i>Pseudomonas fluorescens</i> Pf0-1                                        | Core205922_3  | <i>Pseudomonas fluorescens</i> Pf0-1                        |
| <i>Pseudomonas putida</i> KT2440                                            | Core160488_1  | <i>Pseudomonas putida</i> KT2440                            |
| <i>Ralstonia solanacearum</i> GMI1000                                       | Core267608_1  | <i>Ralstonia solanacearum</i> GMI1000                       |
| <i>Rhodopseudomonas palustris</i> CGA009                                    | Core258594_1  | <i>Rhodopseudomonas palustris</i> CGA009                    |
| <i>Rickettsia prowazekii</i> str. Madrid E                                  | Core272947_1  | <i>Rickettsia prowazekii</i> Madrid E                       |
| <i>Rubrobacter xylanophilus</i> DSM 9941                                    | Core266117_6  | <i>Rubrobacter xylanophilus</i> DSM 9941                    |
| <i>Salinibacter ruber</i> DSM 13855                                         | Core309807_5  | <i>Salinibacter ruber</i> M31, DSM 13855                    |
| <i>Salmonella typhimurium</i> LT2                                           | Core99287_1   | <i>Salmonella enterica enterica sv</i> Typhimurium LT2 LT2  |
| <i>Shewanella frigidimarina</i> NCIMB 400                                   | Seed318167_10 | <i>Shewanella frigidimarina</i> NCIMB 400                   |
| <i>Shewanella oneidensis</i> MR-1                                           | Seed211586_1  | <i>Shewanella oneidensis</i> MR-1                           |
| <i>Shigella flexneri</i> 2a str. 2457T                                      | Core198215_1  | <i>Shigella flexneri</i> 2a 2457T                           |
| <i>Sinorhizobium meliloti</i> 1021                                          | Core266834_1  | <i>Ensifer meliloti</i> 1021                                |
| <i>Staphylococcus aureus</i> subsp. <i>aureus</i> COL                       | Core93062_4   | <i>Staphylococcus aureus aureus</i> COL                     |
| <i>Staphylococcus aureus</i> subsp. <i>aureus</i> Mu50                      | Core158878_1  | <i>Staphylococcus aureus aureus</i> M                       |
| <i>Staphylococcus aureus</i> subsp. <i>aureus</i> N315                      | Core158879_1  | <i>Staphylococcus aureus aureus</i> N315                    |

|                                                       |               |                                                   |
|-------------------------------------------------------|---------------|---------------------------------------------------|
| Staphylococcus aureus subsp. aureus NCTC 8325         | Core93061_3   | Staphylococcus aureus aureus NCTC 8325            |
| Streptococcus pneumoniae R6                           | Core171101_1  | Streptococcus pneumoniae R6                       |
| Streptococcus pneumoniae TIGR4                        | Core170187_1  | Streptococcus pneumoniae TIGR4                    |
| Streptococcus thermophilus CNRZ1066                   | Core299768_3  | Streptococcus thermophilus CNRZ1066               |
| Streptomyces coelicolor A3(2)                         | Core100226_1  | Streptomyces coelicolor A3(2)                     |
| Symbiobacterium thermophilum IAM 14863                | Core292459_1  | Symbiobacterium thermophilum IAM 14863            |
| Thermotoga maritima MSB8                              | Core243274_1  | Thermotoga maritima MSB8                          |
| Thiobacillus denitrificans ATCC 25259                 | Core292415_3  | Thiobacillus denitrificans ATCC 25259             |
| Thiomicrospira crunogena XCL-2                        | Core39765_1   | Thiomicrospira crunogena XCL-2                    |
| Thiomicrospira denitrificans ATCC 33889               | Core326298_3  | Sulfurimonas denitrificans DSM 1251               |
| Treponema pallidum subsp. pallidum str. Nichols       | Core243276_1  | Treponema pallidum pallidum Nichols               |
| Tropheryma whipplei str. Twist                        | Core203267_1  | Tropheryma whipplei Twist                         |
| Ureaplasma parvum serovar 3 ATCC 700970               | Core273119_1  | Ureaplasma parvum sv 3, ATCC 700970               |
| Vibrio cholerae O1 biovar eltor str. N16961           | Core243277_1  | Vibrio cholerae O1 bv El Tor, N16961              |
| Vibrio parahaemolyticus RIMD 2210633                  | Core223926_1  | Vibrio parahaemolyticus RIMD 2210633              |
| Vibrio vulnificus YJ016                               | Seed196600_1  | Vibrio vulnificus YJ016                           |
| Wolbachia sp. endosymbiont of Drosophila melanogaster | Core163164_1  | Wolbachia endosymbiont of Drosophila melanogaster |
| Xylella fastidiosa 9a5c                               | Core160492_1  | Xylella fastidiosa 9a5c                           |
| Yersinia pestis CO92                                  | Core214092_1  | Yersinia pestis CO-92                             |
| Zymomonas mobilis subsp. mobilis ZM4                  | Core264203_3  | Zymomonas mobilis mobilis ZM4                     |
| Campylobacter jejuni subsp. jejuni 84-25              | Core360110_3  | Campylobacter jejuni jejuni 84-25                 |
| Campylobacter jejuni subsp. jejuni CF93-6             | Core360111_3  | Campylobacter jejuni jejuni CF93-6                |
| Agrobacterium tumefaciens str. C58                    | Core176299_3  | Agrobacterium tumefaciens C58-UWash               |
| Corynebacterium glutamicum ATCC 13032                 | Core196627_4  | Corynebacterium glutamicum Nakagawa ATCC 13032    |
| Bartonella bacilliformis KC583                        | Core360095_3  | Bartonella bacilliformis KC583                    |
| Francisella tularensis subsp. novicida U112           | Core401614_5  | Francisella tularensis novicida U112              |
| Rhizobium leguminosarum bv. viciae 3841               | Core216596_1  | Rhizobium leguminosarum bv. viciae 3841           |
| Acinetobacter baumannii ATCC 17978                    | Core400667_4  | Acinetobacter baumannii ATCC 17978                |
| Burkholderia cepacia R1808                            | Core269482_1  | Burkholderia vietnamiensis G4                     |
| Shigella dysenteriae M131649                          | Core216598_1  | Shigella dysenteriae Sd197                        |
| Yersinia pestis Pestoides F                           | Core386656_4  | Yersinia pestis Pestoides F                       |
| Clostridium beijerincki beijerinckii NCIMB 8052       | Core290402_34 | Clostridium beijerinckii NCIMB 8052               |
| Kineococcus radiotolerans SRS30216                    | Core266940_1  | Kineococcus radiotolerans SRS30216                |
| Klebsiella pneumoniae MGH 78578                       | Core272620_3  | Klebsiella pneumoniae pneumoniae MGH78578         |
| Pseudomonas putida GB-1                               | Core76869_3   | Pseudomonas putida GB-1                           |
| Thermoanaerobacter sp. X514                           | Core399726_4  | Thermoanaerobacter sp. X514                       |
| Elusimicrobium minutum Pei191                         | Core445932_3  | Elusimicrobium minutum Pei191                     |

|                                            |              |                                             |
|--------------------------------------------|--------------|---------------------------------------------|
| Flavobacterium johnsonia johnsoniae UW101  | Core376686_6 | Flavobacterium johnsoniae UW101, ATCC 17061 |
| Bacillus subtilis subsp. subtilis str. 168 | Opt224308_1  | Bacillus subtilis subtilis 168              |
| Escherichia coli K-12, MG1655              | Core83333_1  | Escherichia coli K-12, MG1655               |
| Vibrio cholerae O395                       | Core345073_6 | Vibrio cholerae O395                        |
| Listeria monocytogenes J0161               | Core393130_3 | Listeria monocytogenes J0161, FSL R2-499    |
