# Supplementary material for: Emergent Biosynthetic Capacity in Simple Microbial Communities
Source: PLOS journal article supplement (doi:10.1371/journal.pcbi.1003695), 2014-07-03
Supplement: S12 (10.1371/journal.pcbi.1003695.s012) [file journal.pcbi.1003695.s012]

301 Moved Permanently

# Moved Permanently

The document has moved here.

---

Apache Server at www.ploscompbiol.org Port 80
